# Supplementary material for: Animal Sourced Foods and Child Stunting
Source: PubMed Central journal article supplement — Am J Agric Econ. 2018 Jul 31;100(5):1302–19. doi: 10.1093/ajae/aay053 (PMC7734193; doi:10.1093/ajae/aay053), 2018-07-31
Supplement: AJAE-100-05-1302-s001.pdf [file AJAE-100-05-1302-s001.pdf]

**AJAE appendix for *Animal sourced foods and child stunting***

**Authors:** Derek Headey, International Food Policy Research Institute (IFPRI); Kalle Hirvonen, International Food Policy Research Institute (IFPRI); John Hoddinott, Cornell University

**Date:** May 22<sup>nd</sup>, 2018

**Note:** The material contained herein is supplementary to the article named in the title and published in the American Journal of Agricultural Economics (AJAE).

**Table of contents:**

**Table S1. Observations by region and country**

**Figure S1. An LPOLY of stunting by child age for five major regions**

**Table S2. Full regression results of Table 5**

**Table S3. ASFs are negatively associated with stunting when controlling for wealth terciles**

**Table S1. Observations by region and country**

| <u>Latin America &amp; Caribbean</u>      |               |            | <u>Western &amp; Central Africa</u>  |               |            |
|-------------------------------------------|---------------|------------|--------------------------------------|---------------|------------|
| Country                                   | Freq.         | Percent    | Country                              | Freq.         | Percent    |
| Bolivia                                   | 2,397         | 8.16       | Benin                                | 3,017         | 8.05       |
| Colombia                                  | 4,522         | 15.39      | Burkina Faso                         | 2,054         | 5.48       |
| Republic                                  | 1,017         | 3.46       | Cameroon                             | 1,753         | 4.68       |
| Guyana                                    | 499           | 1.7        | Congo (Brazzaville)                  | 1,438         | 3.84       |
| Haiti                                     | 2,139         | 7.28       | Congo Democratic                     |               |            |
| Honduras                                  | 6,007         | 20.44      | Republic                             | 2,468         | 6.59       |
| Peru                                      | 12,806        | 43.58      | Cote d'Ivoire                        | 1,014         | 2.71       |
| <b>Total</b>                              | <b>29,387</b> | <b>100</b> | Gabon                                | 1,128         | 3.01       |
|                                           |               |            | Ghana                                | 791           | 2.11       |
|                                           |               |            | Guinea                               | 1,003         | 2.68       |
|                                           |               |            | Liberia                              | 2,445         | 6.52       |
|                                           |               |            | Mali                                 | 1,315         | 3.51       |
|                                           |               |            | Niger                                | 1,387         | 3.7        |
|                                           |               |            | Nigeria                              | 14,022        | 37.42      |
|                                           |               |            | Sao Tome and Principe                | 492           | 1.31       |
|                                           |               |            | Senegal                              | 1,157         | 3.09       |
|                                           |               |            | Sierra Leone                         | 1,990         | 5.31       |
|                                           |               |            | <b>Total</b>                         | <b>37,474</b> | <b>100</b> |
|                                           |               |            |                                      |               |            |
| <u>Middle East &amp; North Africa</u>     |               |            | <u>Eastern &amp; Southern Africa</u> |               |            |
| Country                                   | Freq.         | Percent    | Country                              | Freq.         | Percent    |
| Azerbaijan                                | 581           | 4.02       | Burundi                              | 1,052         | 4.31       |
| Egypt                                     | 7,858         | 54.4       | Comoros                              | 736           | 3.02       |
| Jordan                                    | 1,882         | 13.03      | Ethiopia                             | 2,698         | 11.06      |
| Yemen                                     | 4,124         | 28.55      | Lesotho                              | 534           | 2.19       |
| <b>Total</b>                              | <b>14,445</b> | <b>100</b> | Madagascar                           | 1,500         | 6.15       |
|                                           |               |            | Malawi                               | 1,479         | 6.06       |
|                                           |               |            | Mozambique                           | 3,134         | 12.84      |
|                                           |               |            | Namibia                              | 1,926         | 7.89       |
|                                           |               |            | Rwanda                               | 1,137         | 4.66       |
|                                           |               |            | Swaziland                            | 718           | 2.94       |
|                                           |               |            | Uganda                               | 1,481         | 6.07       |
|                                           |               |            | Zambia                               | 5,206         | 21.33      |
|                                           |               |            | Zimbabwe                             | 2,804         | 11.49      |
|                                           |               |            | <b>Total</b>                         | <b>24,405</b> | <b>100</b> |
|                                           |               |            |                                      |               |            |
| <u>South, Central and South-East Asia</u> |               |            |                                      |               |            |
| Country                                   | Freq.         | Percent    |                                      |               |            |
| Bangladesh                                | 2,256         | 9.13       |                                      |               |            |
| Cambodia                                  | 1,136         | 4.6        |                                      |               |            |
| India                                     | 12,629        | 51.09      |                                      |               |            |
| Kyrgyz Republic                           | 1,336         | 5.4        |                                      |               |            |
| Maldives                                  | 735           | 2.97       |                                      |               |            |
| Nepal                                     | 2,208         | 8.93       |                                      |               |            |
| Pakistan                                  | 882           | 3.57       |                                      |               |            |
| Tajikistan                                | 1,471         | 5.95       |                                      |               |            |
| Timor-Leste                               | 2,068         | 8.37       |                                      |               |            |
| <b>Total</b>                              | <b>24,721</b> | <b>100</b> |                                      |               |            |

**Figure S1. An LPOLY of stunting by child age for five major regions**

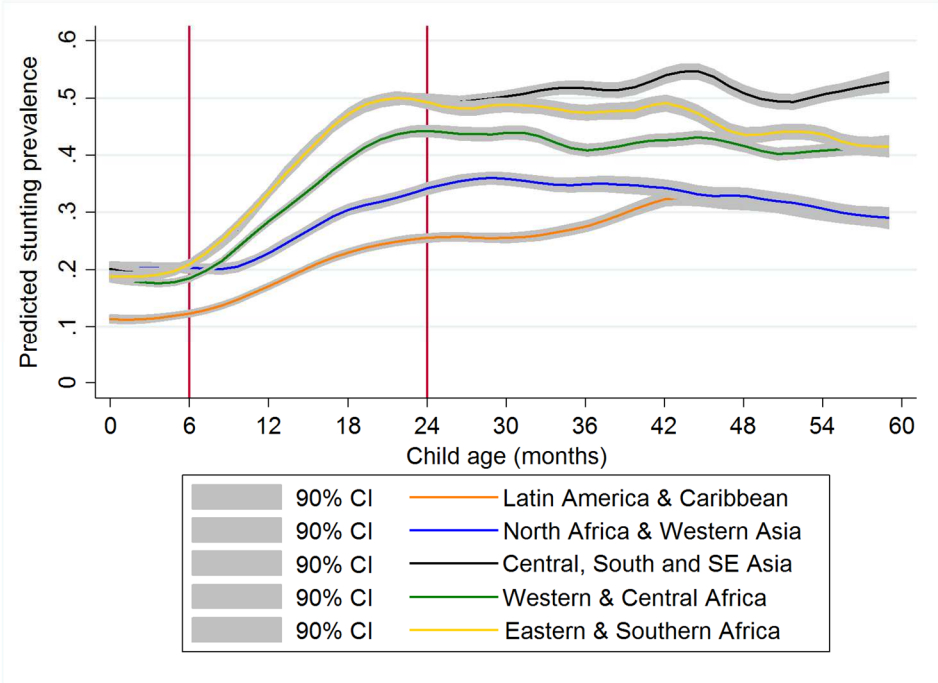

Notes: These are local polynomial plots of stunting against child age, with 90% confidence intervals, for 296,370 children aged 0-59 months.

**Table S2. Full results for Table 5**

|                             | (1)<br>6-23 months   | (2)<br>6-11 months   | (3)<br>12-17 months  | (4)<br>18-23 months  |
|-----------------------------|----------------------|----------------------|----------------------|----------------------|
| Any ASF                     | -0.023***<br>(0.003) | -0.016***<br>(0.005) | -0.011**<br>(0.006)  | -0.040***<br>(0.006) |
| Grains/roots/tubers         | -0.015***<br>(0.004) | -0.023***<br>(0.006) | -0.001<br>(0.008)    | -0.013<br>(0.009)    |
| Legumes/nuts                | -0.006**<br>(0.003)  | -0.007<br>(0.005)    | -0.006<br>(0.005)    | -0.003<br>(0.006)    |
| Any fruit                   | -0.019***<br>(0.003) | -0.015***<br>(0.005) | -0.014***<br>(0.005) | -0.018***<br>(0.005) |
| Any vegetables              | 0.003<br>(0.003)     | -0.006<br>(0.005)    | -0.001<br>(0.005)    | 0.004<br>(0.005)     |
| Fortified infant cereal     | 0.002<br>(0.004)     | 0.009<br>(0.006)     | -0.000<br>(0.007)    | -0.011<br>(0.009)    |
| Currently breastfed         | 0.021***<br>(0.003)  | -0.028***<br>(0.007) | 0.004<br>(0.006)     | 0.036***<br>(0.005)  |
| Infant formula              | -0.000<br>(0.004)    | 0.011*<br>(0.006)    | -0.017**<br>(0.008)  | -0.022**<br>(0.009)  |
| No solid foods              | -0.010*<br>(0.006)   | 0.005<br>(0.007)     | 0.001<br>(0.011)     | -0.015<br>(0.013)    |
| Diarrhea                    | 0.009***<br>(0.003)  | 0.001<br>(0.005)     | 0.011**<br>(0.005)   | 0.018***<br>(0.006)  |
| Medical facility birth      | -0.048***<br>(0.003) | -0.040***<br>(0.005) | -0.050***<br>(0.006) | -0.057***<br>(0.006) |
| Teenage mother              | 0.006**<br>(0.003)   | 0.005<br>(0.005)     | -0.000<br>(0.005)    | 0.018***<br>(0.006)  |
| Women's height (cm)         | -0.010***<br>(0.000) | -0.008***<br>(0.000) | -0.010***<br>(0.000) | -0.013***<br>(0.000) |
| Improved latrine            | -0.069***<br>(0.005) | -0.052***<br>(0.007) | -0.076***<br>(0.008) | -0.083***<br>(0.009) |
| Unimproved latrine          | -0.027***<br>(0.004) | -0.025***<br>(0.006) | -0.035***<br>(0.007) | -0.023***<br>(0.007) |
| Improved water              | -0.002<br>(0.003)    | -0.003<br>(0.005)    | 0.000<br>(0.006)     | -0.000<br>(0.006)    |
| Woman 9+ yrs education      | -0.045***<br>(0.003) | -0.033***<br>(0.005) | -0.044***<br>(0.006) | -0.058***<br>(0.007) |
| Partner 9+ yrs education    | -0.029***<br>(0.003) | -0.016***<br>(0.005) | -0.023***<br>(0.006) | -0.046***<br>(0.006) |
| Partner absent              | -0.011**<br>(0.005)  | -0.004<br>(0.008)    | -0.017*<br>(0.009)   | -0.017<br>(0.011)    |
| Boy                         | 0.063***<br>(0.002)  | 0.053***<br>(0.004)  | 0.075***<br>(0.004)  | 0.061***<br>(0.005)  |
| Rural                       | 0.018***<br>(0.004)  | 0.018***<br>(0.005)  | 0.013**<br>(0.006)   | 0.025***<br>(0.007)  |
| Survey dummies?             | Yes                  | Yes                  | Yes                  | Yes                  |
| Sub-national fixed effects? | Yes                  | Yes                  | Yes                  | Yes                  |
| R-squared                   | 0.149                | 0.104                | 0.141                | 0.167                |
| Observations                | 130,315              | 45,316               | 45,026               | 39,973               |

Notes: See Table 5 in the main text. Wealth variable constructed using household responses to assets and aggregated into an index using a principal components analysis.

**Table S3. ASFs are negatively associated with stunting when controlling for wealth terciles**

|                                                                        | (1)<br>6-23 months    | (2)<br>6-11 months   | (3)<br>12-17 months  | (4)<br>18-23 months  |
|------------------------------------------------------------------------|-----------------------|----------------------|----------------------|----------------------|
| Any ASF                                                                | -0.022***<br>(0.003)  | -0.015***<br>(0.005) | -0.009*<br>(0.006)   | -0.038***<br>(0.006) |
| Grains/roots/tubers                                                    | -0.015***<br>(0.004)  | -0.023***<br>(0.006) | -0.001<br>(0.008)    | -0.012<br>(0.009)    |
| Legumes/nuts                                                           | -0.006**<br>(0.003)   | -0.007<br>(0.005)    | -0.006<br>(0.005)    | -0.002<br>(0.006)    |
| Any fruit                                                              | -0.018***<br>(0.003)  | -0.014***<br>(0.005) | -0.013***<br>(0.005) | -0.017***<br>(0.005) |
| Any vegetables                                                         | 0.003<br>(0.003)      | -0.005<br>(0.005)    | -0.001<br>(0.005)    | 0.005<br>(0.005)     |
| Wealth, lower tercile                                                  | reference             | reference            | reference            | reference            |
| Wealth, middle tercile                                                 | -0.024***<br>(0.004)  | -0.019***<br>(0.006) | -0.022***<br>(0.007) | -0.027***<br>(0.007) |
| Wealth, upper tercile                                                  | -0.061***<br>(0.005)  | -0.046***<br>(0.008) | -0.060***<br>(0.009) | -0.074***<br>(0.010) |
| Coefficient on ASF significantly smaller than other food coefficients? | Yes<br>(except fruit) | No                   | No                   | Yes                  |
| Observations                                                           | 130,315               | 45,316               | 45,026               | 39,973               |
| R-squared                                                              | 0.149                 | 0.104                | 0.141                | 0.167                |

Note: See Table 5 in the main text. Wealth variable constructed using household responses to assets and aggregated into an index using a principal components analysis.
